# Supplementary material for: Thermodynamics of the double sulfates Na2M2+(SO4)2·nH2O (M = Mg, Mn, Co, Ni, Cu, Zn,n= 2 or 4) of the blödite–kröhnkite family
Source: Royal Society of Chemistry journal article supplement (doi:10.1039/d0ra09501j), 2020-12-23
Supplement: d0ra09501j1.pdf [file d0ra09501j1.pdf]

## SUPPORTING INFORMATION (SI)

### **Thermodynamics of the double sulfates $\text{Na}_2\text{M}^{2+}(\text{SO}_4)_2 \cdot n\text{H}_2\text{O}$ (M = Mg, Mn, Co, Ni, Cu, Zn, $n = 2$ or 4) of the blödite-kröhnkite family**

*Juraj Majzlan, Delyana Marinova, Edgar Dachs*

<sup>1</sup> Institute of Geosciences, Friedrich-Schiller University, Burgweg 11, 07749 Jena, Germany

\*corresponding author, email: Juraj.Majzlan@uni-jena.de

<sup>2</sup> Institute of General and Inorganic Chemistry, Bulgarian Academy of Sciences, 1113 Sofia, Bulgaria

<sup>3</sup> Department of Chemistry and Physics of Materials, University of Salzburg, Jakob-Haringer-Strasse 2a, 5020 Salzburg, Austria

\*corresponding author: email: Juraj.Majzlan@uni-jena.de  
telephone: +49-3641-948700  
fax: +49-3641-948602

Number of figures: 0

Number of tables: 10

Number of pagers in SI (including the cover page): 11

**Table S1.** Measured values of molar heat capacity for  $\text{Na}_2\text{Co}(\text{SO}_4)_2 \cdot 4\text{H}_2\text{O}$ .

| $T$     | $C_p$                        |
|---------|------------------------------|---------|------------------------------|---------|------------------------------|---------|------------------------------|---------|------------------------------|
| K       | $\text{J}\cdot\text{K}^{-1}$ |
| 2.19398 | 0.044295                     | 6.82504 | 0.21925                      | 22.0839 | 10.625                       | 72.0107 | 118.222                      | 235.072 | 332.836                      |
| 2.20096 | 0.044238                     | 6.82521 | 0.219148                     | 22.1015 | 10.4817                      | 72.0136 | 118.249                      | 235.146 | 332.704                      |
| 2.20178 | 0.044297                     | 6.82718 | 0.220203                     | 22.102  | 10.7864                      | 72.0546 | 118.205                      | 235.147 | 333.001                      |
| 2.37416 | 0.043636                     | 7.3966  | 0.27765                      | 24.0328 | 13.5443                      | 78.3509 | 131.11                       | 255.77  | 351.173                      |
| 2.37959 | 0.043738                     | 7.39965 | 0.27841                      | 24.0352 | 13.6616                      | 78.357  | 131.176                      | 255.887 | 350.567                      |
| 2.38055 | 0.043649                     | 7.40057 | 0.278222                     | 24.0458 | 13.5432                      | 78.4013 | 130.88                       | 255.891 | 350.959                      |
| 2.56884 | 0.043623                     | 8.04241 | 0.35881                      | 26.1391 | 17.1056                      | 85.2546 | 144.303                      | 278.245 | 370.535                      |
| 2.57331 | 0.043687                     | 8.04525 | 0.359115                     | 26.1485 | 17.12                        | 85.2647 | 144.041                      | 278.448 | 370.271                      |
| 2.57435 | 0.043584                     | 8.0467  | 0.359206                     | 26.1656 | 17.1487                      | 85.3088 | 143.16                       | 278.46  | 370.927                      |
| 2.78246 | 0.044086                     | 8.74296 | 0.46622                      | 28.4498 | 21.3014                      | 92.7805 | 157.368                      | 302.93  | 391.147                      |
| 2.7853  | 0.044235                     | 8.74581 | 0.467083                     | 28.4544 | 21.3014                      | 92.7874 | 157.497                      | 302.946 | 391.214                      |
| 2.78676 | 0.04418                      | 8.74705 | 0.467164                     | 28.459  | 21.4027                      | 92.8161 | 157.612                      | 302.977 | 390.543                      |
| 3.01463 | 0.04573                      | 9.51066 | 0.615481                     | 30.9551 | 26.2168                      | 100.954 | 171.605                      |         |                              |
| 3.01577 | 0.045871                     | 9.51276 | 0.616763                     | 30.9559 | 26.237                       | 100.96  | 171.481                      |         |                              |
| 3.0175  | 0.04575                      | 9.51576 | 0.616553                     | 30.965  | 26.527                       | 100.988 | 171.799                      |         |                              |
| 3.26546 | 0.048868                     | 10.3446 | 0.818001                     | 33.6767 | 31.9394                      | 109.862 | 185.838                      |         |                              |
| 3.26576 | 0.048916                     | 10.3462 | 0.817748                     | 33.6862 | 31.9592                      | 109.87  | 186.125                      |         |                              |
| 3.26724 | 0.048971                     | 10.3529 | 0.819937                     | 33.6915 | 32.0786                      | 109.897 | 186.461                      |         |                              |
| 3.54237 | 0.053142                     | 11.2542 | 1.09554                      | 36.6384 | 38.383                       | 119.549 | 200.42                       |         |                              |
| 3.54265 | 0.053041                     | 11.2568 | 1.09623                      | 36.6486 | 38.3693                      | 119.55  | 201.238                      |         |                              |
| 3.54381 | 0.05322                      | 11.259  | 1.09701                      | 36.6556 | 38.5541                      | 119.559 | 200.682                      |         |                              |
| 3.83628 | 0.058963                     | 12.2372 | 1.469                        | 39.8639 | 45.7229                      | 130.101 | 215.986                      |         |                              |
| 3.83776 | 0.059217                     | 12.2381 | 1.46921                      | 39.8677 | 45.7279                      | 130.103 | 215.587                      |         |                              |
| 3.83808 | 0.059087                     | 12.2457 | 1.47127                      | 39.8957 | 45.7647                      | 130.105 | 215.867                      |         |                              |
| 4.15742 | 0.067241                     | 13.3298 | 1.97976                      | 43.3758 | 53.7766                      | 141.576 | 231.526                      |         |                              |
| 4.15887 | 0.067364                     | 13.3319 | 1.98342                      | 43.3793 | 53.7598                      | 141.581 | 231.124                      |         |                              |
| 4.15925 | 0.067338                     | 13.3349 | 1.98228                      | 43.4087 | 53.7771                      | 141.589 | 230.982                      |         |                              |
| 4.50742 | 0.0786                       | 14.4972 | 2.66683                      | 47.2006 | 62.6997                      | 154.074 | 246.537                      |         |                              |
| 4.50908 | 0.078358                     | 14.4979 | 2.66842                      | 47.2025 | 62.7315                      | 154.075 | 246.863                      |         |                              |
| 4.51062 | 0.078459                     | 14.5031 | 2.66529                      | 47.2328 | 62.6934                      | 154.117 | 246.147                      |         |                              |
| 4.89031 | 0.092552                     | 15.7726 | 3.58692                      | 51.3601 | 72.4698                      | 167.672 | 263.634                      |         |                              |
| 4.89202 | 0.093142                     | 15.7752 | 3.58241                      | 51.3655 | 72.4562                      | 167.683 | 263.573                      |         |                              |
| 4.89213 | 0.092718                     | 15.7775 | 3.57285                      | 51.3871 | 72.461                       | 167.721 | 263.59                       |         |                              |
| 5.30686 | 0.111858                     | 17.1549 | 4.76004                      | 55.885  | 82.9743                      | 182.491 | 280.475                      |         |                              |
| 5.30974 | 0.111901                     | 17.1692 | 4.79854                      | 55.8917 | 82.9779                      | 182.494 | 280.552                      |         |                              |
| 5.30993 | 0.111949                     | 17.1784 | 4.78161                      | 55.9145 | 82.9951                      | 182.522 | 280.477                      |         |                              |
| 5.76264 | 0.137641                     | 18.6504 | 6.29786                      | 60.8072 | 94.1167                      | 198.608 | 297.631                      |         |                              |
| 5.76556 | 0.137764                     | 18.6683 | 6.28363                      | 60.8158 | 94.1196                      | 198.61  | 297.656                      |         |                              |
| 5.76585 | 0.137489                     | 18.6771 | 6.32577                      | 60.8428 | 94.2604                      | 198.645 | 297.397                      |         |                              |
| 6.27657 | 0.174194                     | 20.2915 | 8.25345                      | 66.1695 | 105.991                      | 216.061 | 315.195                      |         |                              |
| 6.28066 | 0.172725                     | 20.3109 | 8.22699                      | 66.1748 | 105.988                      | 216.093 | 315.25                       |         |                              |
| 6.2874  | 0.173375                     | 20.3117 | 8.37139                      | 66.2094 | 105.957                      | 216.097 | 315.606                      |         |                              |

**Table S2.** Molar thermodynamic functions for  $\text{Na}_2\text{Co}(\text{SO}_4)_2 \cdot 4\text{H}_2\text{O}$ , calculated from smoothed heat capacity.

| $T$    | $C_p$                        | $H_T$  | $(H_T - H_0)/T$              | $S_T$                        | $G_T$    | $-(G_T - G_0)/T$             |
|--------|------------------------------|--------|------------------------------|------------------------------|----------|------------------------------|
| K      | $\text{J}\cdot\text{K}^{-1}$ | J      | $\text{J}\cdot\text{K}^{-1}$ | $\text{J}\cdot\text{K}^{-1}$ | J        | $\text{J}\cdot\text{K}^{-1}$ |
| 0      | 0                            | 0      | NaN                          | 0                            | 0        | NaN                          |
| 5      | 0.08464                      | 0.1045 | 0.0209                       | 0.02779                      | -0.03448 | 0.006895                     |
| 10     | 0.7532                       | 1.798  | 0.1798                       | 0.2375                       | -0.577   | 0.0577                       |
| 15     | 2.996                        | 10.19  | 0.6794                       | 0.8884                       | -3.135   | 0.209                        |
| 20     | 7.898                        | 36.34  | 1.817                        | 2.359                        | -10.85   | 0.5423                       |
| 25     | 15.16                        | 93.1   | 3.724                        | 4.862                        | -28.46   | 1.138                        |
| 30     | 24.25                        | 191    | 6.366                        | 8.406                        | -61.21   | 2.04                         |
| 35     | 34.67                        | 337.8  | 9.653                        | 12.91                        | -114.1   | 3.261                        |
| 40     | 45.94                        | 539.1  | 13.48                        | 18.27                        | -191.8   | 4.794                        |
| 45     | 57.65                        | 798    | 17.73                        | 24.36                        | -298.1   | 6.624                        |
| 50     | 69.48                        | 1116   | 22.32                        | 31.04                        | -436.3   | 8.727                        |
| 55     | 81.17                        | 1493   | 27.14                        | 38.22                        | -609.3   | 11.08                        |
| 60     | 92.56                        | 1927   | 32.12                        | 45.77                        | -819.1   | 13.65                        |
| 65     | 103.6                        | 2418   | 37.19                        | 53.62                        | -1067    | 16.42                        |
| 70     | 114.1                        | 2962   | 42.31                        | 61.68                        | -1356    | 19.37                        |
| 75     | 124.2                        | 3558   | 47.44                        | 69.9                         | -1685    | 22.46                        |
| 80     | 133.9                        | 4203   | 52.54                        | 78.22                        | -2055    | 25.68                        |
| 85     | 143.2                        | 4896   | 57.6                         | 86.62                        | -2467    | 29.02                        |
| 90     | 152.3                        | 5635   | 62.61                        | 95.07                        | -2921    | 32.46                        |
| 95     | 161                          | 6418   | 67.56                        | 103.5                        | -3418    | 35.97                        |
| 100    | 169.6                        | 7245   | 72.45                        | 112                          | -3956    | 39.56                        |
| 110    | 186.1                        | 9024   | 82.04                        | 129                          | -5161    | 46.92                        |
| 120    | 201.5                        | 10960  | 91.36                        | 145.8                        | -6535    | 54.46                        |
| 130    | 215.6                        | 13050  | 100.4                        | 162.5                        | -8077    | 62.13                        |
| 140    | 229                          | 15270  | 109.1                        | 179                          | -9785    | 69.89                        |
| 150    | 241.8                        | 17630  | 117.5                        | 195.2                        | -11660   | 77.71                        |
| 160    | 254.1                        | 20110  | 125.7                        | 211.2                        | -13690   | 85.56                        |
| 170    | 266.1                        | 22710  | 133.6                        | 227                          | -15880   | 93.41                        |
| 180    | 277.6                        | 25430  | 141.3                        | 242.5                        | -18230   | 101.3                        |
| 190    | 288.6                        | 28260  | 148.7                        | 257.8                        | -20730   | 109.1                        |
| 200    | 299.2                        | 31200  | 156                          | 272.9                        | -23380   | 116.9                        |
| 210    | 309.3                        | 34240  | 163.1                        | 287.8                        | -26190   | 124.7                        |
| 220    | 319                          | 37380  | 169.9                        | 302.4                        | -29140   | 132.4                        |
| 230    | 328.2                        | 40620  | 176.6                        | 316.8                        | -32230   | 140.1                        |
| 240    | 337.1                        | 43950  | 183.1                        | 330.9                        | -35470   | 147.8                        |
| 250    | 345.9                        | 47360  | 189.5                        | 344.9                        | -38850   | 155.4                        |
| 260    | 354.6                        | 50860  | 195.6                        | 358.6                        | -42370   | 163                          |
| 270    | 363.3                        | 54450  | 201.7                        | 372.1                        | -46020   | 170.5                        |
| 273.15 | 366                          | 55600  | 203.6                        | 376.4                        | -47200   | 172.8                        |
| 280    | 372                          | 58130  | 207.6                        | 385.5                        | -49810   | 177.9                        |
| 290    | 380.5                        | 61890  | 213.4                        | 398.7                        | -53730   | 185.3                        |
| 298.15 | 387.2                        | 65020  | 218.1                        | 409.3                        | -57030   | 191.3                        |
| 300    | 388.7                        | 65740  | 219.1                        | 411.7                        | -57790   | 192.6                        |

**Table S3.** Measured values of molar heat capacity for  $\text{Na}_2\text{Mg}(\text{SO}_4)_2 \cdot 4\text{H}_2\text{O}$ .

| $T$     | $C_p$                        |
|---------|------------------------------|---------|------------------------------|---------|------------------------------|---------|------------------------------|---------|------------------------------|
| K       | $\text{J}\cdot\text{K}^{-1}$ |
| 2.20004 | 0.008104                     | 6.81241 | 0.18589                      | 22.065  | 9.82788                      | 71.9697 | 112.424                      | 235.043 | 327.721                      |
| 2.20069 | 0.008105                     | 6.81348 | 0.186054                     | 22.0779 | 9.33913                      | 71.9832 | 113.825                      | 235.126 | 327.522                      |
| 2.20323 | 0.008136                     | 6.8172  | 0.185735                     | 22.0824 | 10.0953                      | 71.9908 | 112.327                      | 235.131 | 327.145                      |
| 2.37641 | 0.009679                     | 7.38597 | 0.239815                     | 24.0053 | 12.5203                      | 78.3118 | 124.772                      | 255.71  | 346.062                      |
| 2.37779 | 0.009679                     | 7.38963 | 0.240088                     | 24.0082 | 12.533                       | 78.3247 | 124.813                      | 255.871 | 345.918                      |
| 2.3807  | 0.009692                     | 7.39018 | 0.240267                     | 24.0364 | 12.4826                      | 78.3347 | 125.57                       | 255.876 | 345.91                       |
| 2.57093 | 0.011571                     | 8.02889 | 0.312893                     | 26.1241 | 15.8882                      | 85.2286 | 138.097                      | 278.255 | 366.506                      |
| 2.57216 | 0.011594                     | 8.03239 | 0.313817                     | 26.1304 | 15.8998                      | 85.2363 | 139.263                      | 278.416 | 366.384                      |
| 2.57471 | 0.011605                     | 8.03347 | 0.313119                     | 26.1345 | 16.0701                      | 85.2373 | 137.383                      | 278.455 | 366.184                      |
| 2.78257 | 0.013972                     | 8.73071 | 0.410149                     | 28.4178 | 19.8907                      | 92.7413 | 150.319                      | 302.924 | 384.735                      |
| 2.78474 | 0.013892                     | 8.73362 | 0.41132                      | 28.4276 | 19.843                       | 92.7484 | 149.906                      | 302.975 | 385.029                      |
| 2.78741 | 0.013956                     | 8.73513 | 0.411412                     | 28.4321 | 19.9029                      | 92.7503 | 151.641                      | 302.978 | 384.929                      |
| 3.01152 | 0.017052                     | 9.49835 | 0.544074                     | 30.9282 | 24.5474                      | 100.926 | 164.065                      |         |                              |
| 3.01406 | 0.016963                     | 9.50005 | 0.545987                     | 30.9336 | 24.5168                      | 100.929 | 164.639                      |         |                              |
| 3.01721 | 0.016959                     | 9.50396 | 0.545236                     | 30.9406 | 24.659                       | 100.933 | 165.482                      |         |                              |
| 3.26093 | 0.02137                      | 10.3254 | 0.727268                     | 33.6491 | 29.9305                      | 109.826 | 179.154                      |         |                              |
| 3.26292 | 0.021361                     | 10.3268 | 0.727207                     | 33.6628 | 30.2819                      | 109.834 | 178.303                      |         |                              |
| 3.26665 | 0.021313                     | 10.3339 | 0.726692                     | 33.663  | 29.9191                      | 109.84  | 179.512                      |         |                              |
| 3.53832 | 0.026589                     | 11.2375 | 0.973551                     | 36.6114 | 36.0443                      | 119.507 | 192.457                      |         |                              |
| 3.53952 | 0.026628                     | 11.2415 | 0.974947                     | 36.6221 | 36.592                       | 119.516 | 192.829                      |         |                              |
| 3.54333 | 0.02677                      | 11.2444 | 0.97378                      | 36.6254 | 36.0364                      | 119.519 | 192.512                      |         |                              |
| 3.83186 | 0.033509                     | 12.2268 | 1.31165                      | 39.8365 | 43.064                       | 130.045 | 208.453                      |         |                              |
| 3.83349 | 0.03344                      | 12.2292 | 1.31687                      | 39.8368 | 43.0305                      | 130.061 | 208.355                      |         |                              |
| 3.83753 | 0.03381                      | 12.2344 | 1.31421                      | 39.8705 | 43.0595                      | 130.079 | 207.698                      |         |                              |
| 4.1497  | 0.041991                     | 13.3157 | 1.77296                      | 43.345  | 50.7103                      | 141.526 | 223.418                      |         |                              |
| 4.15213 | 0.04231                      | 13.3177 | 1.77715                      | 43.3458 | 50.7178                      | 141.545 | 223.114                      |         |                              |
| 4.15591 | 0.042031                     | 13.3225 | 1.77251                      | 43.3771 | 50.71                        | 141.547 | 223.017                      |         |                              |
| 4.50079 | 0.053219                     | 14.4825 | 2.39579                      | 47.1723 | 59.2229                      | 154.049 | 238.379                      |         |                              |
| 4.50294 | 0.053624                     | 14.4833 | 2.39945                      | 47.1734 | 59.224                       | 154.05  | 239.035                      |         |                              |
| 4.50577 | 0.053501                     | 14.4918 | 2.38892                      | 47.205  | 59.2167                      | 154.052 | 239.105                      |         |                              |
| 4.88202 | 0.067654                     | 15.762  | 3.22626                      | 51.33   | 68.482                       | 167.635 | 256.346                      |         |                              |
| 4.88437 | 0.067643                     | 15.7636 | 3.24788                      | 51.3395 | 68.486                       | 167.647 | 256.455                      |         |                              |
| 4.8874  | 0.067826                     | 15.764  | 3.21581                      | 51.3511 | 69.0627                      | 167.669 | 256.249                      |         |                              |
| 5.29853 | 0.086205                     | 17.1271 | 4.30019                      | 55.8546 | 78.4952                      | 182.442 | 273.876                      |         |                              |
| 5.30155 | 0.086506                     | 17.1296 | 4.29309                      | 55.8662 | 78.507                       | 182.452 | 273.771                      |         |                              |
| 5.30313 | 0.085993                     | 17.1365 | 4.32608                      | 55.8753 | 79.1898                      | 182.464 | 273.736                      |         |                              |
| 5.75504 | 0.110387                     | 18.6545 | 5.70633                      | 60.7768 | 89.1834                      | 198.568 | 291.208                      |         |                              |
| 5.75797 | 0.110222                     | 18.6615 | 5.7603                       | 60.7913 | 89.1128                      | 198.572 | 291.11                       |         |                              |
| 5.75882 | 0.11043                      | 18.6664 | 5.63792                      | 60.7984 | 90.0442                      | 198.597 | 290.933                      |         |                              |
| 6.27143 | 0.146072                     | 20.2703 | 7.52162                      | 66.1367 | 100.458                      | 216.018 | 309.434                      |         |                              |
| 6.27855 | 0.143525                     | 20.2827 | 7.54995                      | 66.1487 | 101.739                      | 216.063 | 309.021                      |         |                              |
| 6.29488 | 0.143433                     | 20.2936 | 7.53974                      | 66.1549 | 100.461                      | 216.069 | 309.215                      |         |                              |

**Table S4.** Molar thermodynamic functions for  $\text{Na}_2\text{Mg}(\text{SO}_4)_2 \cdot 4\text{H}_2\text{O}$ , calculated from smoothed heat capacity.

| $T$    | $C_p$                          | $H_T$   | $(H_T - H_0)/T$                | $S_T$                          | $G_T$    | $-(G_T - G_0)/T$               |
|--------|--------------------------------|---------|--------------------------------|--------------------------------|----------|--------------------------------|
| K      | $\text{J} \cdot \text{K}^{-1}$ | J       | $\text{J} \cdot \text{K}^{-1}$ | $\text{J} \cdot \text{K}^{-1}$ | J        | $\text{J} \cdot \text{K}^{-1}$ |
| 0      | 0                              | 0       | NaN                            | 0                              | 0        | NaN                            |
| 5      | 0.07403                        | 0.09123 | 0.01825                        | 0.02426                        | -0.03006 | 0.006012                       |
| 10     | 0.6678                         | 1.585   | 0.1585                         | 0.2092                         | -0.5061  | 0.05061                        |
| 15     | 2.702                          | 9.106   | 0.6071                         | 0.7921                         | -2.775   | 0.185                          |
| 20     | 7.21                           | 32.84   | 1.642                          | 2.127                          | -9.695   | 0.4848                         |
| 25     | 14.03                          | 85.06   | 3.402                          | 4.429                          | -25.67   | 1.027                          |
| 30     | 22.68                          | 176.2   | 5.872                          | 7.727                          | -55.65   | 1.855                          |
| 35     | 32.66                          | 314.1   | 8.974                          | 11.96                          | -104.5   | 2.986                          |
| 40     | 43.46                          | 504.1   | 12.6                           | 17.02                          | -176.6   | 4.416                          |
| 45     | 54.66                          | 749.3   | 16.65                          | 22.78                          | -275.9   | 6.13                           |
| 50     | 65.93                          | 1051    | 21.02                          | 29.12                          | -405.4   | 8.108                          |
| 55     | 77.05                          | 1408    | 25.61                          | 35.93                          | -567.9   | 10.32                          |
| 60     | 87.88                          | 1821    | 30.35                          | 43.1                           | -765.3   | 12.76                          |
| 65     | 98.37                          | 2287    | 35.18                          | 50.55                          | -999.4   | 15.37                          |
| 70     | 108.5                          | 2804    | 40.06                          | 58.22                          | -1271    | 18.16                          |
| 75     | 118.3                          | 3371    | 44.95                          | 66.04                          | -1582    | 21.09                          |
| 80     | 127.8                          | 3987    | 49.83                          | 73.98                          | -1932    | 24.15                          |
| 85     | 137.1                          | 4649    | 54.69                          | 82.01                          | -2322    | 27.31                          |
| 90     | 146.1                          | 5357    | 59.52                          | 90.1                           | -2752    | 30.58                          |
| 95     | 154.9                          | 6110    | 64.32                          | 98.24                          | -3223    | 33.92                          |
| 100    | 163.5                          | 6906    | 69.06                          | 106.4                          | -3734    | 37.34                          |
| 110    | 179.5                          | 8622    | 78.38                          | 122.7                          | -4880    | 44.37                          |
| 120    | 194.1                          | 10490   | 87.43                          | 139                            | -6189    | 51.58                          |
| 130    | 207.7                          | 12500   | 96.16                          | 155.1                          | -7660    | 58.92                          |
| 140    | 221.1                          | 14640   | 104.6                          | 171                            | -9290    | 66.36                          |
| 150    | 234.1                          | 16920   | 112.8                          | 186.7                          | -11080   | 73.86                          |
| 160    | 246.8                          | 19330   | 120.8                          | 202.2                          | -13020   | 81.39                          |
| 170    | 259                            | 21850   | 128.6                          | 217.5                          | -15120   | 88.95                          |
| 180    | 270.7                          | 24500   | 136.1                          | 232.6                          | -17370   | 96.51                          |
| 190    | 282                            | 27270   | 143.5                          | 247.6                          | -19770   | 104.1                          |
| 200    | 292.9                          | 30140   | 150.7                          | 262.3                          | -22320   | 111.6                          |
| 210    | 303.2                          | 33120   | 157.7                          | 276.9                          | -25020   | 119.1                          |
| 220    | 313.1                          | 36210   | 164.6                          | 291.2                          | -27860   | 126.6                          |
| 230    | 322.6                          | 39380   | 171.2                          | 305.3                          | -30840   | 134.1                          |
| 240    | 331.8                          | 42660   | 177.7                          | 319.3                          | -33970   | 141.5                          |
| 250    | 340.8                          | 46020   | 184.1                          | 333                            | -37230   | 148.9                          |
| 260    | 349.8                          | 49470   | 190.3                          | 346.5                          | -40630   | 156.3                          |
| 270    | 358.8                          | 53020   | 196.4                          | 359.9                          | -44160   | 163.5                          |
| 273.15 | 361.7                          | 54150   | 198.2                          | 364.1                          | -45300   | 165.8                          |
| 280    | 367.8                          | 56650   | 202.3                          | 373.1                          | -47820   | 170.8                          |
| 290    | 376.3                          | 60370   | 208.2                          | 386.2                          | -51620   | 178                            |
| 298.15 | 382.2                          | 63460   | 212.8                          | 396.7                          | -54810   | 183.8                          |
| 300    | 383.3                          | 64170   | 213.9                          | 399                            | -55550   | 185.2                          |

**Table S5.** Measured values of molar heat capacity for  $\text{Na}_2\text{Mn}(\text{SO}_4)_2 \cdot 2\text{H}_2\text{O}$ .

| $T$<br>K | $C_p$<br>$\text{J}\cdot\text{K}^{-1}$ |
|----------|---------------------------------------|----------|---------------------------------------|----------|---------------------------------------|----------|---------------------------------------|----------|---------------------------------------|----------|---------------------------------------|
| 2.20599  | 6.75699                               | 5.3223   | 4.69126                               | 10.3586  | 2.92337                               | 17.1809  | 5.49015                               | 43.3629  | 47.706                                | 141.565  | 182.317                               |
| 2.21351  | 6.75683                               | 5.32245  | 4.68918                               | 10.3616  | 2.92127                               | 17.3089  | 5.67843                               | 43.3933  | 47.7238                               | 141.567  | 182.24                                |
| 2.21378  | 6.75587                               | 5.42598  | 4.619                                 | 10.6222  | 2.9811                                | 17.593   | 5.89403                               | 47.1856  | 55.1501                               | 154.06   | 192.988                               |
| 2.38348  | 6.78733                               | 5.71301  | 4.39145                               | 10.9154  | 3.01625                               | 17.8886  | 6.13446                               | 47.1868  | 55.158                                | 154.061  | 193.461                               |
| 2.39201  | 6.78326                               | 5.76203  | 4.35871                               | 11.2023  | 3.05848                               | 18.1861  | 6.38286                               | 47.2171  | 55.1542                               | 154.064  | 192.339                               |
| 2.39226  | 6.78269                               | 5.77888  | 4.33733                               | 11.2525  | 3.03312                               | 18.4678  | 6.63466                               | 51.3447  | 63.1589                               | 167.647  | 205.624                               |
| 2.57643  | 6.75354                               | 5.77923  | 4.33942                               | 11.2691  | 3.03134                               | 18.6378  | 6.71388                               | 51.3519  | 63.19                                 | 167.654  | 205.452                               |
| 2.58583  | 6.74726                               | 6.00011  | 4.19338                               | 11.2717  | 3.03334                               | 18.6741  | 6.74567                               | 51.3685  | 63.1844                               | 167.681  | 205.857                               |
| 2.58608  | 6.74723                               | 6.27021  | 3.96896                               | 11.4925  | 3.11245                               | 18.6787  | 6.66558                               | 55.8709  | 71.6746                               | 182.443  | 218.148                               |
| 2.78546  | 6.669                                 | 6.28042  | 3.95922                               | 11.7859  | 3.17632                               | 18.7595  | 6.90342                               | 55.8812  | 71.6644                               | 182.449  | 218.049                               |
| 2.79748  | 6.65895                               | 6.28097  | 3.95921                               | 12.071   | 3.25774                               | 19.0574  | 7.18226                               | 55.8923  | 71.8143                               | 182.466  | 218.105                               |
| 2.79783  | 6.65863                               | 6.28674  | 4.00758                               | 12.2454  | 3.27699                               | 19.3393  | 7.45732                               | 60.7949  | 80.5342                               | 198.568  | 230.383                               |
| 3.01382  | 6.5607                                | 6.5885   | 3.81925                               | 12.2581  | 3.27506                               | 19.6332  | 7.75598                               | 60.8104  | 80.5747                               | 198.573  | 230.48                                |
| 3.02751  | 6.54379                               | 6.81282  | 3.66228                               | 12.2601  | 3.27091                               | 19.9338  | 8.05677                               | 60.8254  | 80.8382                               | 198.594  | 230.677                               |
| 3.02793  | 6.54237                               | 6.8326   | 3.6507                                | 12.3614  | 3.349                                 | 20.2874  | 8.36619                               | 66.1553  | 89.8386                               | 216.005  | 243.617                               |
| 3.14001  | 6.48931                               | 6.84861  | 3.83992                               | 12.6545  | 3.4397                                | 20.3041  | 8.38266                               | 66.1712  | 89.8871                               | 216.06   | 243.216                               |
| 3.2684   | 6.42252                               | 6.87714  | 3.67603                               | 12.9427  | 3.55827                               | 20.322   | 8.28324                               | 66.1805  | 90.2293                               | 216.063  | 243.245                               |
| 3.28332  | 6.40455                               | 7.15334  | 3.54793                               | 13.2341  | 3.67889                               | 22.0731  | 10.4678                               | 71.9832  | 99.2258                               | 235.021  | 256.725                               |
| 3.28408  | 6.40307                               | 7.39074  | 3.40652                               | 13.3198  | 3.68318                               | 22.0916  | 10.6334                               | 72.0085  | 100.258                               | 235.119  | 256.497                               |
| 3.43014  | 6.31996                               | 7.41533  | 3.39806                               | 13.3311  | 3.6831                                | 22.1075  | 10.1711                               | 72.0089  | 99.0228                               | 235.122  | 256.386                               |
| 3.53838  | 6.24976                               | 7.41719  | 3.39554                               | 13.332   | 3.67733                               | 24.0214  | 13.1392                               | 78.3398  | 108.917                               | 255.719  | 270.414                               |
| 3.5535   | 6.22996                               | 7.441    | 3.42767                               | 13.5243  | 3.82677                               | 24.0223  | 12.9854                               | 78.3399  | 109.292                               | 255.864  | 270.028                               |
| 3.55395  | 6.22828                               | 7.73109  | 3.31764                               | 13.8169  | 3.97537                               | 24.0259  | 12.9903                               | 78.3672  | 109.275                               | 255.865  | 270.115                               |
| 3.71315  | 6.12002                               | 8.01839  | 3.22755                               | 14.1049  | 4.14254                               | 26.1269  | 16.0823                               | 85.245   | 118.975                               | 278.219  | 285.534                               |
| 3.83286  | 6.01925                               | 8.03506  | 3.18196                               | 14.3973  | 4.31813                               | 26.1378  | 16.0904                               | 85.2494  | 119.026                               | 278.428  | 285.065                               |
| 3.84799  | 6.00225                               | 8.05791  | 3.17684                               | 14.4887  | 4.34597                               | 26.1577  | 16.0473                               | 85.2677  | 119.256                               | 278.433  | 285.144                               |
| 3.84834  | 6.00183                               | 8.05949  | 3.17629                               | 14.4949  | 4.3294                                | 28.433   | 19.7583                               | 92.7607  | 128.334                               | 302.936  | 298.6                                 |
| 3.99623  | 5.87767                               | 8.30772  | 3.15125                               | 14.4996  | 4.33605                               | 28.437   | 19.7619                               | 92.7733  | 128.678                               | 302.966  | 298.894                               |
| 4.15278  | 5.7362                                | 8.59679  | 3.0773                                | 14.6884  | 4.51206                               | 28.4428  | 20.0261                               | 92.7836  | 129.027                               | 302.966  | 298.645                               |
| 4.16909  | 5.7123                                | 8.73369  | 3.01681                               | 14.9827  | 4.73192                               | 30.9426  | 24.0305                               | 100.941  | 139.244                               |          |                                       |
| 4.16935  | 5.71174                               | 8.7583   | 3.01251                               | 15.2663  | 4.9123                                | 30.9471  | 24.0476                               | 100.942  | 139.222                               |          |                                       |
| 4.28178  | 5.61667                               | 8.76206  | 3.01195                               | 15.5511  | 4.76611                               | 30.9524  | 24.2715                               | 100.961  | 139.599                               |          |                                       |
| 4.5043   | 5.41337                               | 8.88669  | 3.02664                               | 15.77    | 4.69401                               | 33.6622  | 29.004                                | 109.848  | 150.285                               |          |                                       |
| 4.52126  | 5.38559                               | 9.17686  | 2.99539                               | 15.7706  | 4.6956                                | 33.6725  | 29.0125                               | 109.849  | 149.512                               |          |                                       |
| 4.52154  | 5.38269                               | 9.46392  | 2.9686                                | 15.775   | 4.68135                               | 33.6765  | 29.1723                               | 109.859  | 150.558                               |          |                                       |
| 4.56687  | 5.35022                               | 9.50169  | 2.92802                               | 15.8448  | 4.76711                               | 36.6231  | 34.5693                               | 119.526  | 160.03                                |          |                                       |
| 4.85244  | 5.09161                               | 9.52321  | 2.92757                               | 16.144   | 4.91269                               | 36.6352  | 34.5736                               | 119.533  | 160.247                               |          |                                       |
| 4.88645  | 5.06338                               | 9.52586  | 2.921                                 | 16.4338  | 5.07725                               | 36.6364  | 34.7981                               | 119.547  | 160.036                               |          |                                       |
| 4.90423  | 5.04142                               | 9.75414  | 2.94823                               | 16.7284  | 5.26786                               | 39.8501  | 40.9025                               | 130.063  | 171.629                               |          |                                       |
| 4.90441  | 5.04164                               | 10.0441  | 2.9503                                | 17.016   | 5.46426                               | 39.853   | 40.8753                               | 130.085  | 171.153                               |          |                                       |
| 5.13919  | 4.85134                               | 10.3348  | 2.95795                               | 17.1422  | 5.49008                               | 39.8815  | 40.8693                               | 130.086  | 171.364                               |          |                                       |
| 5.30369  | 4.7164                                | 10.3392  | 2.92586                               | 17.148   | 5.4924                                | 43.3613  | 47.7099                               | 141.554  | 182.265                               |          |                                       |

**Table S6.** Molar thermodynamic functions for  $\text{Na}_2\text{Mn}(\text{SO}_4)_2 \cdot 2\text{H}_2\text{O}$ , calculated from smoothed heat capacity.

| $T$    | $C_p$                        | $H_T$ | $(H_T - H_0)/T$              | $S_T$                        | $G_T$  | $-(G_T - G_0)/T$             |
|--------|------------------------------|-------|------------------------------|------------------------------|--------|------------------------------|
| K      | $\text{J}\cdot\text{K}^{-1}$ | J     | $\text{J}\cdot\text{K}^{-1}$ | $\text{J}\cdot\text{K}^{-1}$ | J      | $\text{J}\cdot\text{K}^{-1}$ |
| 0      | 0                            | 0     | NaN                          | 0                            | 0      | NaN                          |
| 5      | 4.962                        | 27.15 | 5.43                         | 15.8                         | -51.83 | 10.37                        |
| 10     | 2.943                        | 45.02 | 4.502                        | 18.36                        | -138.5 | 13.85                        |
| 15     | 4.748                        | 62.65 | 4.177                        | 19.76                        | -233.8 | 15.58                        |
| 20     | 8.078                        | 92.51 | 4.625                        | 21.45                        | -336.6 | 16.83                        |
| 25     | 14.38                        | 147.8 | 5.91                         | 23.89                        | -449.6 | 17.98                        |
| 30     | 22.45                        | 239.3 | 7.976                        | 27.21                        | -577   | 19.23                        |
| 35     | 31.55                        | 373.9 | 10.68                        | 31.34                        | -723   | 20.66                        |
| 40     | 41.18                        | 555.6 | 13.89                        | 36.18                        | -891.6 | 22.29                        |
| 45     | 50.96                        | 786   | 17.47                        | 41.59                        | -1086  | 24.13                        |
| 50     | 60.64                        | 1065  | 21.3                         | 47.47                        | -1308  | 26.17                        |
| 55     | 70.08                        | 1392  | 25.31                        | 53.69                        | -1561  | 28.38                        |
| 60     | 79.17                        | 1765  | 29.42                        | 60.18                        | -1846  | 30.76                        |
| 65     | 87.86                        | 2183  | 33.58                        | 66.86                        | -2163  | 33.28                        |
| 70     | 96.14                        | 2643  | 37.76                        | 73.68                        | -2515  | 35.92                        |
| 75     | 104                          | 3144  | 41.92                        | 80.59                        | -2900  | 38.67                        |
| 80     | 111.5                        | 3683  | 46.03                        | 87.54                        | -3320  | 41.51                        |
| 85     | 118.7                        | 4258  | 50.1                         | 94.52                        | -3776  | 44.42                        |
| 90     | 125.5                        | 4869  | 54.1                         | 101.5                        | -4266  | 47.4                         |
| 95     | 132                          | 5513  | 58.03                        | 108.5                        | -4791  | 50.43                        |
| 100    | 138.3                        | 6189  | 61.89                        | 115.4                        | -5350  | 53.5                         |
| 110    | 150                          | 7631  | 69.37                        | 129.1                        | -6573  | 59.75                        |
| 120    | 160.9                        | 9186  | 76.55                        | 142.6                        | -7932  | 66.1                         |
| 130    | 171                          | 10850 | 83.43                        | 155.9                        | -9425  | 72.5                         |
| 140    | 180.6                        | 12600 | 90.03                        | 169                          | -11050 | 78.93                        |
| 150    | 189.8                        | 14460 | 96.37                        | 181.7                        | -12800 | 85.36                        |
| 160    | 198.7                        | 16400 | 102.5                        | 194.3                        | -14680 | 91.77                        |
| 170    | 207.5                        | 18430 | 108.4                        | 206.6                        | -16690 | 98.16                        |
| 180    | 215.9                        | 20550 | 114.2                        | 218.7                        | -18810 | 104.5                        |
| 190    | 224                          | 22750 | 119.7                        | 230.6                        | -21060 | 110.8                        |
| 200    | 231.8                        | 25030 | 125.1                        | 242.3                        | -23420 | 117.1                        |
| 210    | 239.1                        | 27380 | 130.4                        | 253.7                        | -25910 | 123.4                        |
| 220    | 246.2                        | 29810 | 135.5                        | 265                          | -28500 | 129.5                        |
| 230    | 253                          | 32300 | 140.4                        | 276.1                        | -31210 | 135.7                        |
| 240    | 259.7                        | 34870 | 145.3                        | 287                          | -34020 | 141.8                        |
| 250    | 266.4                        | 37500 | 150                          | 297.8                        | -36950 | 147.8                        |
| 260    | 273.1                        | 40190 | 154.6                        | 308.3                        | -39980 | 153.8                        |
| 270    | 279.8                        | 42960 | 159.1                        | 318.8                        | -43110 | 159.7                        |
| 273.15 | 281.8                        | 43840 | 160.5                        | 322                          | -44120 | 161.5                        |
| 280    | 286.3                        | 45790 | 163.5                        | 329.1                        | -46350 | 165.5                        |
| 290    | 292.3                        | 48680 | 167.9                        | 339.2                        | -49690 | 171.4                        |
| 298.15 | 296.6                        | 51080 | 171.3                        | 347.4                        | -52490 | 176.1                        |
| 300    | 297.4                        | 51630 | 172.1                        | 349.2                        | -53130 | 177.1                        |

**Table S7.** Measured values of molar heat capacity for  $\text{Na}_2\text{Ni}(\text{SO}_4)_2 \cdot 4\text{H}_2\text{O}$ .

| $T$<br>K | $C_p$<br>$\text{J}\cdot\text{K}^{-1}$ |
|----------|---------------------------------------|----------|---------------------------------------|----------|---------------------------------------|----------|---------------------------------------|----------|---------------------------------------|
| 2.20385  | 5.16725                               | 6.80592  | 2.50981                               | 22.0666  | 10.1534                               | 71.9899  | 110.98                                | 235.015  | 323.992                               |
| 2.21425  | 5.17463                               | 6.82546  | 2.50087                               | 22.0868  | 10.2929                               | 72.0072  | 111.16                                | 235.113  | 324.006                               |
| 2.21444  | 5.17555                               | 6.82768  | 2.49359                               | 22.0919  | 10.2115                               | 72.0199  | 111.657                               | 235.114  | 324.131                               |
| 2.38057  | 5.29625                               | 7.38043  | 2.30156                               | 24.0138  | 12.882                                | 78.3445  | 123.487                               | 255.7    | 342.27                                |
| 2.39246  | 5.29792                               | 7.40288  | 2.29186                               | 24.0185  | 12.879                                | 78.356   | 123.538                               | 255.843  | 342.064                               |
| 2.39251  | 5.29745                               | 7.40803  | 2.29022                               | 24.0545  | 12.9267                               | 78.3688  | 123.33                                | 255.856  | 341.818                               |
| 2.57192  | 5.33705                               | 8.0279   | 2.12026                               | 26.1238  | 16.1862                               | 85.2455  | 135.858                               | 278.195  | 362.887                               |
| 2.58613  | 5.33166                               | 8.04921  | 2.11133                               | 26.1432  | 16.1897                               | 85.2515  | 136.049                               | 278.399  | 361.966                               |
| 2.58668  | 5.33232                               | 8.05289  | 2.11005                               | 26.1664  | 16.0278                               | 85.266   | 136.695                               | 278.417  | 362.38                                |
| 2.78239  | 5.29706                               | 8.72295  | 1.99173                               | 28.4387  | 20.111                                | 92.7593  | 148.715                               | 302.952  | 380.242                               |
| 2.79767  | 5.28697                               | 8.74537  | 1.9863                                | 28.4433  | 20.1228                               | 92.7708  | 148.868                               | 302.956  | 380.405                               |
| 2.7979   | 5.28627                               | 8.75324  | 1.98279                               | 28.4503  | 20.2254                               | 92.7789  | 149.636                               | 302.963  | 380.509                               |
| 3.01116  | 5.20557                               | 9.49194  | 1.92297                               | 30.9464  | 24.6888                               | 100.933  | 162.682                               |          |                                       |
| 3.02485  | 5.19194                               | 9.50971  | 1.9238                                | 30.9552  | 24.7171                               | 100.935  | 162.354                               |          |                                       |
| 3.02794  | 5.1883                                | 9.51583  | 1.91968                               | 30.9555  | 24.8287                               | 100.965  | 162.526                               |          |                                       |
| 3.26024  | 5.08232                               | 10.3346  | 1.93411                               | 33.6656  | 30.0215                               | 109.839  | 176.839                               |          |                                       |
| 3.28324  | 5.04713                               | 10.3499  | 1.93223                               | 33.6682  | 30.0185                               | 109.852  | 176.719                               |          |                                       |
| 3.28396  | 5.04552                               | 10.3556  | 1.9316                                | 33.6776  | 30.243                                | 109.858  | 177.87                                |          |                                       |
| 3.53553  | 4.88243                               | 11.2367  | 2.03388                               | 36.6279  | 36.0245                               | 119.512  | 191.673                               |          |                                       |
| 3.55337  | 4.8635                                | 11.248   | 2.03257                               | 36.6362  | 36.0453                               | 119.525  | 191.156                               |          |                                       |
| 3.5535   | 4.86197                               | 11.2534  | 2.03194                               | 36.639   | 36.2407                               | 119.54   | 190.928                               |          |                                       |
| 3.82956  | 4.64446                               | 12.2171  | 2.23933                               | 39.8539  | 42.9158                               | 130.065  | 207.045                               |          |                                       |
| 3.8479   | 4.62193                               | 12.2302  | 2.24071                               | 39.8631  | 43.1667                               | 130.076  | 206.266                               |          |                                       |
| 3.84811  | 4.62231                               | 12.2395  | 2.24211                               | 39.8666  | 42.9016                               | 130.091  | 205.998                               |          |                                       |
| 4.14966  | 4.3591                                | 13.3141  | 2.59458                               | 43.3612  | 50.4606                               | 141.549  | 221.901                               |          |                                       |
| 4.16871  | 4.33375                               | 13.3213  | 2.5956                                | 43.3736  | 50.4808                               | 141.561  | 221.724                               |          |                                       |
| 4.16879  | 4.33168                               | 13.3276  | 2.59427                               | 43.3793  | 50.7298                               | 141.564  | 221.615                               |          |                                       |
| 4.5012   | 4.04133                               | 14.4863  | 3.13038                               | 47.1878  | 58.8206                               | 154.064  | 237.1                                 |          |                                       |
| 4.52044  | 4.01401                               | 14.4903  | 3.12949                               | 47.1891  | 58.8108                               | 154.066  | 236.485                               |          |                                       |
| 4.52078  | 4.01464                               | 14.4963  | 3.13114                               | 47.2202  | 58.8065                               | 154.067  | 235.227                               |          |                                       |
| 4.88309  | 3.712                                 | 15.7631  | 3.89744                               | 51.3451  | 67.9021                               | 167.643  | 253.737                               |          |                                       |
| 4.90311  | 3.68488                               | 15.7665  | 3.90132                               | 51.3574  | 67.9234                               | 167.647  | 253.725                               |          |                                       |
| 4.90405  | 3.68587                               | 15.7742  | 3.89767                               | 51.3636  | 68.2487                               | 167.68   | 253.783                               |          |                                       |
| 5.29966  | 3.39122                               | 17.135   | 4.9146                                | 55.8709  | 77.7606                               | 182.422  | 270.773                               |          |                                       |
| 5.32062  | 3.36703                               | 17.1597  | 4.96403                               | 55.8851  | 77.7594                               | 182.463  | 271.47                                |          |                                       |
| 5.32176  | 3.3635                                | 17.1605  | 4.94671                               | 55.8895  | 78.1487                               | 182.468  | 271.177                               |          |                                       |
| 5.75401  | 3.07414                               | 18.6589  | 6.29083                               | 60.8007  | 88.2808                               | 198.57   | 288.514                               |          |                                       |
| 5.77616  | 3.05322                               | 18.6697  | 6.31457                               | 60.8178  | 88.2683                               | 198.571  | 287.928                               |          |                                       |
| 5.77804  | 3.04997                               | 18.6708  | 6.34865                               | 60.8218  | 88.8424                               | 198.599  | 288.11                                |          |                                       |
| 6.2482   | 2.78702                               | 20.2839  | 7.96854                               | 66.16    | 99.4677                               | 215.999  | 306.315                               |          |                                       |
| 6.27228  | 2.7672                                | 20.3011  | 8.06134                               | 66.1754  | 99.4167                               | 216.055  | 305.885                               |          |                                       |
| 6.27494  | 2.76374                               | 20.3203  | 8.02921                               | 66.1791  | 100.131                               | 216.064  | 305.949                               |          |                                       |



**Table S8.** Molar thermodynamic functions for  $\text{Na}_2\text{Ni}(\text{SO}_4)_2 \cdot 4\text{H}_2\text{O}$ , calculated from smoothed heat capacity.

| $T$    | $C_p$                        | $H_T$ | $(H_T - H_0)/T$              | $S_T$                        | $G_T$  | $-(G_T - G_0)/T$             |
|--------|------------------------------|-------|------------------------------|------------------------------|--------|------------------------------|
| K      | $\text{J}\cdot\text{K}^{-1}$ | J     | $\text{J}\cdot\text{K}^{-1}$ | $\text{J}\cdot\text{K}^{-1}$ | J      | $\text{J}\cdot\text{K}^{-1}$ |
| 0      | 0                            | 0     | NaN                          | 0                            | 0      | NaN                          |
| 5      | 3.66                         | 21.11 | 4.222                        | 12.37                        | -40.75 | 8.151                        |
| 10     | 1.941                        | 33.21 | 3.321                        | 14.12                        | -108   | 10.8                         |
| 15     | 3.406                        | 45.37 | 3.025                        | 15.09                        | -181   | 12.06                        |
| 20     | 7.706                        | 72.07 | 3.603                        | 16.59                        | -259.8 | 12.99                        |
| 25     | 14.39                        | 126.4 | 5.057                        | 18.99                        | -348.4 | 13.94                        |
| 30     | 22.89                        | 219   | 7.299                        | 22.34                        | -451.4 | 15.05                        |
| 35     | 32.67                        | 357.5 | 10.21                        | 26.59                        | -573.3 | 16.38                        |
| 40     | 43.23                        | 547   | 13.67                        | 31.64                        | -718.6 | 17.97                        |
| 45     | 54.18                        | 790.4 | 17.57                        | 37.36                        | -890.9 | 19.8                         |
| 50     | 65.22                        | 1089  | 21.78                        | 43.64                        | -1093  | 21.86                        |
| 55     | 76.13                        | 1442  | 26.23                        | 50.37                        | -1328  | 24.15                        |
| 60     | 86.8                         | 1850  | 30.83                        | 57.46                        | -1597  | 26.62                        |
| 65     | 97.15                        | 2310  | 35.54                        | 64.81                        | -1903  | 29.28                        |
| 70     | 107.2                        | 2821  | 40.3                         | 72.38                        | -2246  | 32.09                        |
| 75     | 116.9                        | 3381  | 45.08                        | 80.11                        | -2627  | 35.03                        |
| 80     | 126.3                        | 3989  | 49.87                        | 87.96                        | -3047  | 38.09                        |
| 85     | 135.4                        | 4644  | 54.63                        | 95.89                        | -3507  | 41.26                        |
| 90     | 144.3                        | 5343  | 59.37                        | 103.9                        | -4006  | 44.51                        |
| 95     | 153                          | 6087  | 64.07                        | 111.9                        | -4546  | 47.85                        |
| 100    | 161.4                        | 6873  | 68.73                        | 120                          | -5126  | 51.26                        |
| 110    | 177.4                        | 8567  | 77.88                        | 136.1                        | -6406  | 58.24                        |
| 120    | 192.3                        | 10420 | 86.8                         | 152.2                        | -7848  | 65.4                         |
| 130    | 206.2                        | 12410 | 95.46                        | 168.1                        | -9450  | 72.69                        |
| 140    | 219.3                        | 14540 | 103.8                        | 183.9                        | -11210 | 80.07                        |
| 150    | 232                          | 16790 | 112                          | 199.5                        | -13130 | 87.51                        |
| 160    | 244.3                        | 19180 | 119.8                        | 214.8                        | -15200 | 94.99                        |
| 170    | 256.3                        | 21680 | 127.5                        | 230                          | -17420 | 102.5                        |
| 180    | 268                          | 24300 | 135                          | 245                          | -19800 | 110                          |
| 190    | 279.2                        | 27040 | 142.3                        | 259.8                        | -22320 | 117.5                        |
| 200    | 290                          | 29880 | 149.4                        | 274.4                        | -24990 | 125                          |
| 210    | 300.2                        | 32830 | 156.4                        | 288.8                        | -27810 | 132.4                        |
| 220    | 309.9                        | 35890 | 163.1                        | 303                          | -30770 | 139.9                        |
| 230    | 319.2                        | 39030 | 169.7                        | 317                          | -33870 | 147.3                        |
| 240    | 328.2                        | 42270 | 176.1                        | 330.7                        | -37110 | 154.6                        |
| 250    | 337                          | 45590 | 182.4                        | 344.3                        | -40480 | 161.9                        |
| 260    | 346                          | 49010 | 188.5                        | 357.7                        | -43990 | 169.2                        |
| 270    | 354.9                        | 52510 | 194.5                        | 370.9                        | -47640 | 176.4                        |
| 273.15 | 357.8                        | 53640 | 196.4                        | 375.1                        | -48810 | 178.7                        |
| 280    | 363.8                        | 56110 | 200.4                        | 384                          | -51410 | 183.6                        |
| 290    | 372.1                        | 59790 | 206.2                        | 396.9                        | -55320 | 190.7                        |
| 298.15 | 377.8                        | 62850 | 210.8                        | 407.3                        | -58590 | 196.5                        |
| 300    | 378.9                        | 63550 | 211.8                        | 409.6                        | -59350 | 197.8                        |

**Table S9.** Measured values of molar heat capacity for  $\text{Na}_2\text{Zn}(\text{SO}_4)_2 \cdot 4\text{H}_2\text{O}$ .

| $T$     | $C_p$                        |
|---------|------------------------------|---------|------------------------------|---------|------------------------------|---------|------------------------------|---------|------------------------------|
| K       | $\text{J}\cdot\text{K}^{-1}$ |
| 2.19932 | 0.010854                     | 6.81457 | 0.231717                     | 22.084  | 11.6823                      | 71.9876 | 125.593                      | 235.003 | 348.11                       |
| 2.20009 | 0.010852                     | 6.81789 | 0.230069                     | 22.0945 | 11.6374                      | 71.9978 | 125.467                      | 235.132 | 348.82                       |
| 2.20238 | 0.010877                     | 6.82129 | 0.231755                     | 22.0969 | 11.5984                      | 72.0027 | 125.792                      | 235.133 | 348.216                      |
| 2.37647 | 0.01295                      | 7.38776 | 0.296404                     | 24.0212 | 14.807                       | 78.3325 | 139.083                      | 255.7   | 367.014                      |
| 2.37722 | 0.012987                     | 7.39096 | 0.297008                     | 24.0338 | 15.1323                      | 78.3411 | 138.734                      | 255.877 | 366.635                      |
| 2.37986 | 0.012999                     | 7.39102 | 0.296767                     | 24.0439 | 14.8437                      | 78.3469 | 139.278                      | 255.88  | 366.282                      |
| 2.57063 | 0.015439                     | 8.03061 | 0.385872                     | 26.1263 | 18.6398                      | 85.2338 | 152.596                      | 278.193 | 387.841                      |
| 2.5721  | 0.015471                     | 8.03368 | 0.386018                     | 26.129  | 18.6603                      | 85.2497 | 151.936                      | 278.446 | 386.722                      |
| 2.5748  | 0.015521                     | 8.03473 | 0.386808                     | 26.1704 | 18.5812                      | 85.2507 | 152.834                      | 278.449 | 386.915                      |
| 2.78379 | 0.018509                     | 8.73442 | 0.505759                     | 28.4358 | 23.1762                      | 92.7514 | 166.328                      | 302.938 | 409.05                       |
| 2.78441 | 0.018565                     | 8.7368  | 0.507109                     | 28.4384 | 23.1691                      | 92.7643 | 166.263                      | 302.959 | 408.799                      |
| 2.7877  | 0.0186                       | 8.73922 | 0.507392                     | 28.442  | 23.3125                      | 92.7709 | 166.394                      | 302.971 | 408.947                      |
| 3.01308 | 0.022528                     | 9.49501 | 0.670769                     | 30.9416 | 28.4342                      | 100.931 | 181.398                      |         |                              |
| 3.01438 | 0.022537                     | 9.49861 | 0.671563                     | 30.9455 | 28.6182                      | 100.94  | 181.086                      |         |                              |
| 3.0171  | 0.022697                     | 9.50025 | 0.671296                     | 30.9475 | 28.4592                      | 100.953 | 181.197                      |         |                              |
| 3.26243 | 0.028079                     | 10.3334 | 0.898151                     | 33.6615 | 34.5546                      | 109.837 | 196.457                      |         |                              |
| 3.26406 | 0.027978                     | 10.337  | 0.900043                     | 33.6696 | 34.5211                      | 109.846 | 196.484                      |         |                              |
| 3.26705 | 0.028115                     | 10.3388 | 0.898526                     | 33.6705 | 34.7312                      | 109.868 | 196.327                      |         |                              |
| 3.53886 | 0.034695                     | 11.2385 | 1.20465                      | 36.6237 | 41.3898                      | 119.514 | 211.573                      |         |                              |
| 3.54044 | 0.034793                     | 11.2397 | 1.20075                      | 36.6249 | 41.3754                      | 119.531 | 211.954                      |         |                              |
| 3.54327 | 0.034816                     | 11.2451 | 1.20802                      | 36.6331 | 41.5323                      | 119.539 | 211.498                      |         |                              |
| 3.83322 | 0.043556                     | 12.2288 | 1.62195                      | 39.8484 | 49.2457                      | 130.055 | 227.96                       |         |                              |
| 3.83493 | 0.043573                     | 12.2327 | 1.62563                      | 39.851  | 49.6188                      | 130.086 | 227.09                       |         |                              |
| 3.83763 | 0.043716                     | 12.2335 | 1.62445                      | 39.8611 | 49.1852                      | 130.086 | 227.353                      |         |                              |
| 4.15294 | 0.054546                     | 13.2981 | 2.18652                      | 43.358  | 57.7448                      | 141.559 | 242.144                      |         |                              |
| 4.1549  | 0.054496                     | 13.3003 | 2.18335                      | 43.3602 | 58.2278                      | 141.566 | 243.219                      |         |                              |
| 4.1581  | 0.054829                     | 13.3105 | 2.18941                      | 43.3722 | 57.7475                      | 141.57  | 243.451                      |         |                              |
| 4.50284 | 0.068597                     | 14.4796 | 2.95025                      | 47.1826 | 67.1778                      | 154.038 | 259.086                      |         |                              |
| 4.50457 | 0.068667                     | 14.4805 | 2.95381                      | 47.1921 | 67.6874                      | 154.05  | 259.129                      |         |                              |
| 4.50826 | 0.068844                     | 14.488  | 2.95352                      | 47.1965 | 67.1788                      | 154.071 | 259.148                      |         |                              |
| 4.88405 | 0.086357                     | 15.7615 | 3.96385                      | 51.3409 | 77.4279                      | 167.658 | 276.731                      |         |                              |
| 4.88644 | 0.086513                     | 15.7636 | 3.95651                      | 51.3464 | 78.014                       | 167.667 | 277.134                      |         |                              |
| 4.88797 | 0.086614                     | 15.7701 | 3.97681                      | 51.3543 | 77.4525                      | 167.668 | 276.706                      |         |                              |
| 5.30133 | 0.108904                     | 17.1466 | 5.27139                      | 55.8662 | 88.4682                      | 182.478 | 294.618                      |         |                              |
| 5.30328 | 0.10906                      | 17.1506 | 5.27963                      | 55.8715 | 89.1949                      | 182.479 | 294.842                      |         |                              |
| 5.30534 | 0.109592                     | 17.1532 | 5.33008                      | 55.8814 | 88.4828                      | 182.496 | 294.178                      |         |                              |
| 5.75594 | 0.138667                     | 18.6575 | 6.93271                      | 60.7889 | 100.188                      | 198.582 | 312.065                      |         |                              |
| 5.7587  | 0.138736                     | 18.6728 | 6.95481                      | 60.792  | 101.008                      | 198.584 | 312.148                      |         |                              |
| 5.75991 | 0.139135                     | 18.673  | 6.91077                      | 60.8014 | 100.176                      | 198.599 | 312.02                       |         |                              |
| 6.27126 | 0.178661                     | 20.2996 | 9.02351                      | 66.155  | 112.614                      | 215.984 | 330.579                      |         |                              |
| 6.27903 | 0.179271                     | 20.3059 | 9.05161                      | 66.1648 | 113.315                      | 216.069 | 330.532                      |         |                              |
| 6.28799 | 0.180488                     | 20.3207 | 8.985                        | 66.1684 | 112.548                      | 216.072 | 330.154                      |         |                              |

**Table S10.** Molar thermodynamic functions for Na<sub>2</sub>Zn(SO<sub>4</sub>)<sub>2</sub>·4H<sub>2</sub>O, calculated from smoothed heat capacity.

| $T$    | $C_p$             | $H_T$  | $(H_T-H_0)/T$     | $S_T$             | $G_T$    | $-(G_T-G_0)/T$    |
|--------|-------------------|--------|-------------------|-------------------|----------|-------------------|
| K      | J·K <sup>-1</sup> | J      | J·K <sup>-1</sup> | J·K <sup>-1</sup> | J        | J·K <sup>-1</sup> |
| 0      | 0                 | 0      | NaN               | 0                 | 0        | NaN               |
| 5      | 0.09249           | 0.1141 | 0.02282           | 0.03034           | -0.03762 | 0.007523          |
| 10     | 0.8284            | 1.973  | 0.1973            | 0.2604            | -0.6314  | 0.06314           |
| 15     | 3.335             | 11.29  | 0.7525            | 0.9824            | -3.448   | 0.2299            |
| 20     | 8.657             | 40.11  | 2.006             | 2.604             | -11.97   | 0.5987            |
| 25     | 16.52             | 102.1  | 4.084             | 5.339             | -31.36   | 1.254             |
| 30     | 26.38             | 208.7  | 6.956             | 9.197             | -67.24   | 2.241             |
| 35     | 37.62             | 368.2  | 10.52             | 14.09             | -125.1   | 3.573             |
| 40     | 49.69             | 586.3  | 14.66             | 19.9              | -209.7   | 5.242             |
| 45     | 62.11             | 865.7  | 19.24             | 26.47             | -325.3   | 7.229             |
| 50     | 74.55             | 1207   | 24.15             | 33.66             | -475.4   | 9.508             |
| 55     | 86.76             | 1611   | 29.29             | 41.34             | -662.7   | 12.05             |
| 60     | 98.6              | 2074   | 34.57             | 49.4              | -889.4   | 14.82             |
| 65     | 110               | 2596   | 39.94             | 57.74             | -1157    | 17.8              |
| 70     | 121               | 3174   | 45.34             | 66.3              | -1467    | 20.96             |
| 75     | 131.7             | 3806   | 50.75             | 75.02             | -1820    | 24.27             |
| 80     | 141.9             | 4490   | 56.12             | 83.84             | -2218    | 27.72             |
| 85     | 151.8             | 5225   | 61.46             | 92.75             | -2659    | 31.28             |
| 90     | 161.5             | 6008   | 66.76             | 101.7             | -3145    | 34.95             |
| 95     | 170.8             | 6839   | 71.99             | 110.7             | -3676    | 38.7              |
| 100    | 179.8             | 7716   | 77.16             | 119.7             | -4252    | 42.52             |
| 110    | 196.9             | 9600   | 87.28             | 137.6             | -5539    | 50.35             |
| 120    | 212.6             | 11650  | 97.07             | 155.4             | -7004    | 58.37             |
| 130    | 227.1             | 13850  | 106.5             | 173               | -8647    | 66.51             |
| 140    | 240.9             | 16190  | 115.6             | 190.4             | -10460   | 74.74             |
| 150    | 254.2             | 18660  | 124.4             | 207.5             | -12450   | 83.02             |
| 160    | 267               | 21270  | 132.9             | 224.3             | -14610   | 91.33             |
| 170    | 279.4             | 24000  | 141.2             | 240.8             | -16940   | 99.63             |
| 180    | 291.5             | 26860  | 149.2             | 257.1             | -19430   | 107.9             |
| 190    | 303               | 29830  | 157               | 273.2             | -22080   | 116.2             |
| 200    | 314               | 32920  | 164.6             | 289               | -24890   | 124.5             |
| 210    | 324.3             | 36110  | 171.9             | 304.6             | -27860   | 132.7             |
| 220    | 334.2             | 39400  | 179.1             | 319.9             | -30980   | 140.8             |
| 230    | 343.6             | 42790  | 186               | 335               | -34260   | 148.9             |
| 240    | 352.7             | 46270  | 192.8             | 349.8             | -37680   | 157               |
| 250    | 361.6             | 49840  | 199.4             | 364.4             | -41250   | 165               |
| 260    | 370.5             | 53500  | 205.8             | 378.7             | -44970   | 173               |
| 270    | 379.5             | 57250  | 212               | 392.9             | -48830   | 180.8             |
| 273.15 | 382.4             | 58450  | 214               | 397.3             | -50070   | 183.3             |
| 280    | 388.6             | 61090  | 218.2             | 406.9             | -52830   | 188.7             |
| 290    | 397.6             | 65030  | 224.2             | 420.6             | -56960   | 196.4             |
| 298.15 | 404.8             | 68290  | 229.1             | 431.8             | -60440   | 202.7             |
| 300    | 406.4             | 69050  | 230.2             | 434.3             | -61240   | 204.1             |
